# Supplementary material
Source: Springer Nature journal article supplement (https://www.springermedizin.de/resource/supplementary/13075_2010_2966_MOESM1_ESM.pdf/9693296)
Supplement: MOESM1 [file 9693296]

22 patients  
randomized

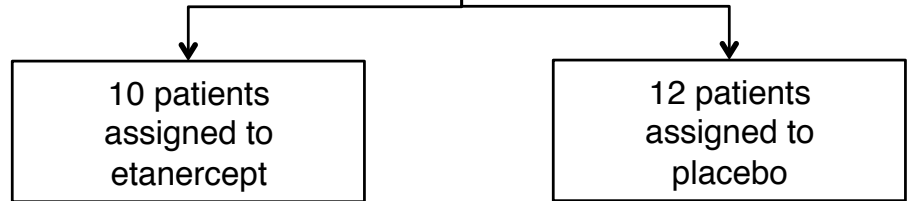

2 patients withdrew:  
Suspected malignancy (1)  
Non-compliance (1)

10 patients  
(etanercept)  
completed the study

10 patients  
(placebo)  
completed the study

21s controls  
randomized

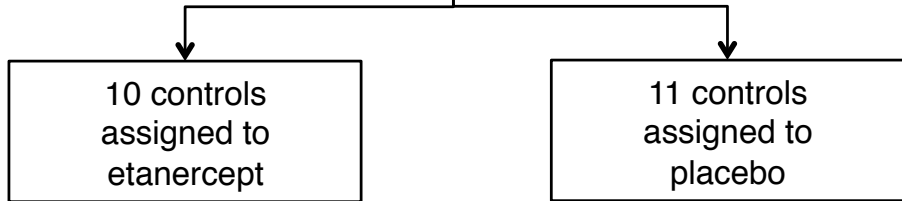

1 control withdrew:  
Non-compliance (1)

10 controls  
(etanercept)  
completed the study

10 controls  
(placebo)  
completed the study
